# Supplementary material for: Comprehensive analysis of TLX2 in pan cancer as a prognostic and immunologic biomarker and validation in ovarian cancer
Source: Sci Rep. 2023 Sep 27;13:16244. doi: 10.1038/s41598-023-42171-5 (PMC10533500; doi:10.1038/s41598-023-42171-5)
Supplement: Supplementary file 3 — Supplementary Table S1. [file 41598_2023_42171_MOESM3_ESM.xlsx]

## Sheet: Sheet1
Table S1. Methylation levels of TLX2 in pan-cancer.
Cancer	Cancer Number	Normal Number	Cancer Q2	Normal Q2	P Value
LAML	140	1	0.1691	0	nan
ACC	80	1	0.1403	0	nan
BLCA	416	21	0.2393	0.128	2.88766e-05
LGG	534	1	0.1556	0	nan
BRCA	794	96	0.2601	0.145	1.48399e-24
CESC	309	3	0.3483	0.1047	0.000194329
CHOL	36	9	0.3552	0.1481	0.000242092
COAD	309	38	0.2383	0.1419	7.99305e-09
ESCA	186	16	0.2298	0.1412	0.000577433
GBM	153	2	0.1418	0.0861	0.0910421
HNSC	530	50	0.2306	0.1495	1.99297e-12
KICH	66	1	0.1166	0	nan
KIRC	323	160	0.1434	0.1056	3.78227e-23
KIRP	276	45	0.1358	0.111	0.00235428
LIHC	380	50	0.2193	0.1539	8.85762e-08
LUAD	471	32	0.3077	0.1674	1.05295e-13
LUSC	370	42	0.1923	0.1292	1.08121e-07
DLBC	48	1	0.281	0	nan
MESO	87	1	0.1697	0	nan
OV	10	1	0.0805	0	nan
PAAD	185	10	0.1989	0.1341	0.0026632
PCPG	184	3	0.064	0.1027	0.149858
PRAD	503	50	0.2575	0.1388	6.74659e-17
READ	99	7	0.2095	0.1378	0.0120356
SARC	265	4	0.1491	0.1223	0.281476
SKCM	473	2	0.3212	0.2208	0.252745
STAD	395	2	0.2531	0.2362	0.581932
TGCT	156	1	0.1122	0	nan
THYM	124	2	0.1499	0.1503	0.798017
THCA	515	56	0.1241	0.1095	0.02737
UCS	57	1	0.1216	0	nan
UCEC	436	46	0.1851	0.1254	5.36308e-07
UVM	80	1	0.1125	0	nan
